# Supplementary material for: Phosphodiesterase-induced cAMP degradation restricts hepatitis B virus infection
Source: PubMed Central journal article supplement (PMC6501904; doi:10.1098/rstb.2018.0292), 2019-04-08

**Figure S4. Silencing efficiency of PDE4D.** Western blot analysis of HepG2-NTCP cells transfected with either control or PDE4D-targeting siRNA. Data shown are representative images of three independent experiments.

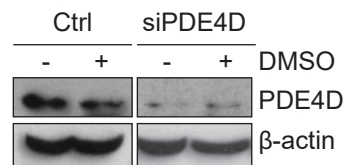

Supplement: rstb20180292supp4.pdf [file rstb20180292supp4.pdf]
