# Supplementary material for: Phosphodiesterase-induced cAMP degradation restricts hepatitis B virus infection
Source: PubMed Central journal article supplement (PMC6501904; doi:10.1098/rstb.2018.0292), 2019-04-08

**Figure S5. Dose dependence of NTCP expression upon PDE4D inhibition.**

Immunofluorescence analysis of NTCP expression on HepG2-NTCP cells 24 hours after inhibition of PDE4D using the indicated concentrations of Roflumilast. Data shown are representative images of three independent experiments.

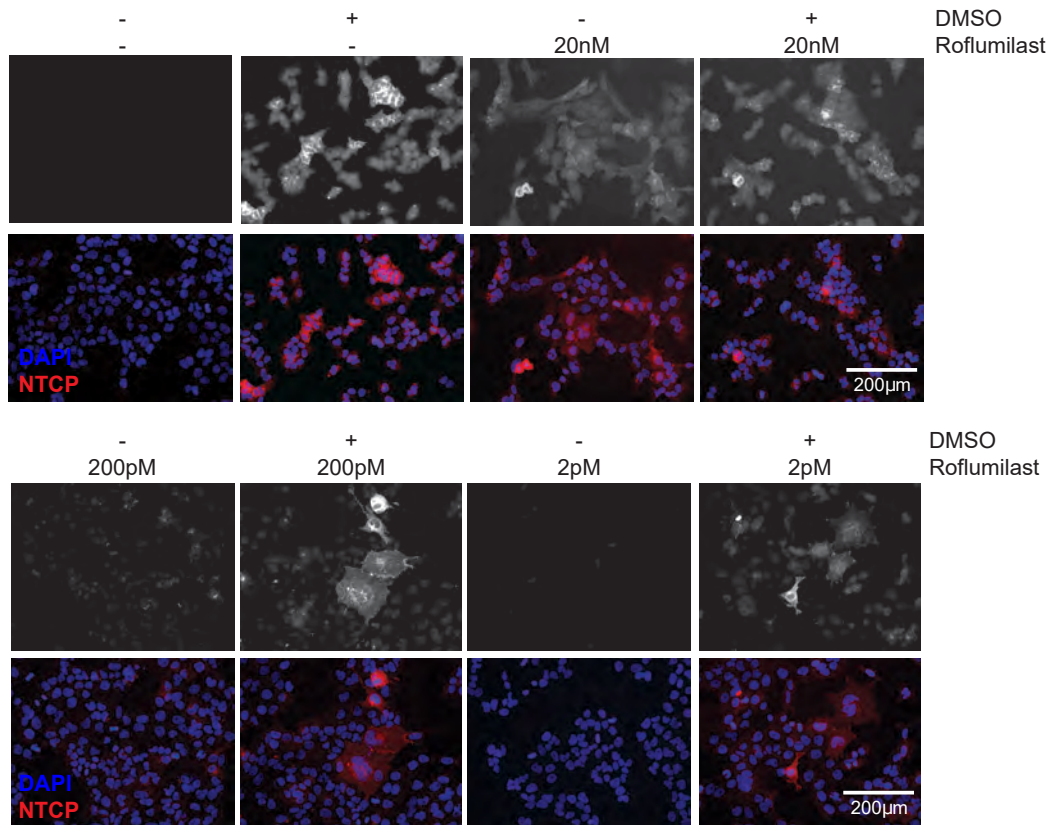

Supplement: rstb20180292supp5.pdf [file rstb20180292supp5.pdf]
